# Supplementary material
Source: PubMed Central journal article supplement (PMC2099673)
Supplement: bjpg57-655TableS1.pdf [file bjpg57-655TableS1.pdf]

**Supplementary Table 1. Studies included in the review, descriptive characteristics, by site, in order of publication date**

A. Low back

| First author, year of publication, city/state, country, setting                     | Age                                  | n            | Primary endpoint, (outcome measure, timing)                                   | Definition of poor outcome at primary endpoint                                             | Observed frequency of outcome                                                    |
|-------------------------------------------------------------------------------------|--------------------------------------|--------------|-------------------------------------------------------------------------------|--------------------------------------------------------------------------------------------|----------------------------------------------------------------------------------|
| Dillane, 1966, London, UK (general practice) <sup>12</sup>                          | All patients in one general practice | 470          | Duration of index attack measured by time between first and last consultation | > 2 weeks duration                                                                         | 131 (38%)                                                                        |
|                                                                                     |                                      |              | Recurrence (within 4 years)                                                   | Experiencing at least one recurrence of back pain within 4 years of index attack           | 154 (45%)                                                                        |
| Pedersen, 1981, Copenhagen, Denmark (general practice) <sup>13</sup>                | >16 years                            | 72           | Symptoms<br>Work absence<br>Bed rest<br>Analgesia use                         | >180 days<br>Unfit for work >1w<br>Any bed rest                                            | 21 (29%)<br>28 (39%)<br>27 (38%)<br>56 (72%)                                     |
| Roland, 1983, London, UK (general practice) <sup>14</sup>                           | 16–64 years                          | 230 episodes | RMDQ (1w and 4w)<br>Sickness absence                                          | RMDQ ≥ 14                                                                                  | 1 month: 15%                                                                     |
| Roland, 1983, London, UK (general practice) <sup>15</sup>                           | 16–64 years                          | 230 episodes | RMDQ<br>Pain rating scale<br>Sickness absence<br>Recurrence of pain           | RMDQ ≥ 14                                                                                  | 1 month: 15%                                                                     |
| Chavannes, 1986, multicentre, Netherlands (general practice) <sup>16</sup>          | 15–66 years                          | 475          | Pain persistence (5 weeks)<br>Localisation of pain                            | Pain 'not better' at follow up (unchanged / aggravated)                                    | 116 (25%)                                                                        |
| Lanier, 1988, Washington DC, USA (primary care) <sup>17</sup>                       | 18–83 years                          | 116          | Days off work<br>Disability (RMDQ) (6 weeks)                                  | >4 days work loss<br>RMDQ score ≥3                                                         | 27 (26%)<br>42 (36%)                                                             |
| Coste, 1994, France (primary care) <sup>20</sup>                                    | >18 years                            | 103          | Complete recovery from pain (90 days)<br>Return to work                       | Continuing pain at 3 months                                                                | 2 (2%)                                                                           |
| Burton, 1995, England, UK (osteopathy) <sup>21</sup>                                | >18 years                            | 252          | RMDQ (1 year)                                                                 | RMDQ score >2 = not recovered                                                              | 70 (41%)                                                                         |
| Klenerman, 1995, Merseyside, UK (general practice) <sup>22</sup>                    | Not given                            | 300          | RMDQ (12m)<br>Present pain                                                    | Pain and disability                                                                        | Not given                                                                        |
| van den Hoogen, 1997, Amsterdam, Netherlands (general practice) <sup>27</sup>       | 16+ years                            | 605          | Duration of pain (12 and 52 weeks)                                            | Persistent pain at follow up                                                               | 12 weeks: 35%<br>52 weeks: 10%                                                   |
| Macfarlane, 1999, Manchester, UK (general practice) <sup>29</sup>                   | 18–75 years                          | 246          | Symptom status (2 weeks)                                                      | -                                                                                          | -                                                                                |
| Reis, 1999, multi-centre, Israel (primary care) <sup>30</sup>                       | >21 yrs                              | 219          | Persistent pain (2 months)                                                    | Back pain at 2 month follow up                                                             | 63%                                                                              |
| Schiottz-Christensen, 1998, North Jutland, Denmark (general practice) <sup>31</sup> | 18–60 years                          | 503          | Sick leave<br>Functional recovery (1 year)                                    | On sick leave between questionnaires or not functionally recovered at follow up            | 2% on sick leave at 1 year<br>8% not considered functionally recovered at 1 year |
| Thomas, 1999, Manchester, UK (general practice) <sup>32</sup>                       | 18–75 years                          | 180          | Persistent disabling low back pain (12 months)                                | Low back pain and disability (Hanover score <75%) at each follow-up interview (1w, 3m, 1y) | 61 (34%)                                                                         |

| First author, year of publication, city/state, country, setting                                      | Age         | n    | Primary endpoint, (outcome measure, timing)                                                                    | Definition of poor outcome at primary endpoint                                                                                                                        | Observed frequency of outcome                                  |
|------------------------------------------------------------------------------------------------------|-------------|------|----------------------------------------------------------------------------------------------------------------|-----------------------------------------------------------------------------------------------------------------------------------------------------------------------|----------------------------------------------------------------|
| Carey, 2000, North Carolina, USA (primary care) <sup>33</sup>                                        | 18+ years   | 1246 | Functional recovery (22 months)                                                                                | Persistence of disabling symptoms (inability to perform usual ADL as well as before having LBP) 3 months after seeking care for a episode of acute low back pain.     | 8% develop chronic low back pain<br>5% unremitting pain at 22m |
| Werneke, 2001, Virginia, USA (physiotherapy) <sup>35</sup>                                           |             | 223  | Maximal pain intensity<br>Work status<br><br>Sick leave<br><br>Activity interference<br>Healthcare utilisation | Pain ≥6 (out of 10)<br><br>Working less than full time, full duty<br>>7 days lost from work<br>>7 days lost from home activity<br>1+ additional visit or consultation | -                                                              |
| Sieben, 2002, Southern Netherlands & Eastern Belgium (general practice) <sup>38</sup>                | 18–65 years | 44   | RMDQ (2w, 3m, 1y)<br>Pain related fear (TSK)<br>Pain catastrophising (PCS)                                     | -                                                                                                                                                                     | -                                                              |
| Enthoven, 2003, Southern Sweden (primary care) <sup>40</sup>                                         | 18–60 years | 44   | Pain (VAS)<br>Back related disability ODI (12 months)                                                          | Reporting >5mm on VAS                                                                                                                                                 | 18 (41%)                                                       |
| Burton, 2004, UK (chiropractor) <sup>41</sup>                                                        | Not stated  | 252  | Pain intensity<br>RMDQ<br>Care seeking                                                                         | -                                                                                                                                                                     | -                                                              |
| Coste, 2004, France (general practice) <sup>42</sup>                                                 | >18 years   | 113  | RMDQ (3m)<br>VAS pain                                                                                          | Recovery: pain ≤ 20mm, RDQ ≤ 3                                                                                                                                        | 6 participants (5%) developed chronic low back pain            |
| Dunn, 2004, North Staffordshire, UK (general practice) <sup>43</sup>                                 | 30–59 years | 556  | RMDQ (12 months)                                                                                               | RMDQ >14                                                                                                                                                              | 138 (30%)                                                      |
| Leboeuf-Yde, 2004, Multicentre, Norway (chiropractor) <sup>44</sup>                                  | 12–80 years | 875  | Pain free patients                                                                                             | Max. pain score >1, max. Oswestry score >15/100                                                                                                                       | 467 (91%)                                                      |
| Grotle, 2004, Oslo, Norway (primary care) <sup>49</sup>                                              | 18–60 years | 123  | Pain intensity<br>RMDQ<br>Sickness absence (3 months)                                                          | Recovered if scored 4 or less on RMDQ at both baseline and 3 month follow up                                                                                          | 24% not recovered at 3 months                                  |
| Kovacs, 2005, Multicentre, Spain (primary care) <sup>50</sup>                                        | 18–87 years | 366  | Quality of Life at 15 and 60 days.<br>Disability at 15 and 60 days                                             | No improvement in disability or quality of life scores                                                                                                                | 11.5% (n = 42)                                                 |
| Sieben, 2005, Multicentre, Netherlands (general practice) <sup>52</sup>                              | >18 years   | 222  | Chronic Pain Grade (12 months)                                                                                 | Grades III / IV                                                                                                                                                       | 17/167 (14.4%)                                                 |
| Koleck, 2006, Multicentre, France (general practice) <sup>54</sup>                                   | 18–60 years | 99   | Chronic pain (1 year)                                                                                          | Chronic pain                                                                                                                                                          | 30 (33.3%) chronic pain at 1 year                              |
| Swinkels-Meewisse, 2006, Multicentre, Netherlands (general practice and physiotherapy) <sup>56</sup> | 18–65 years | 431  | RMDQ and participation (6 months)                                                                              | -                                                                                                                                                                     | -                                                              |

## B. Spinal pain

| First author, year of publication, city/state, country                 | Age         | n    | Primary endpoint, (outcome measure, timing) | Definition of poor outcome at primary endpoint                                       | Observed frequency of poor outcome   |
|------------------------------------------------------------------------|-------------|------|---------------------------------------------|--------------------------------------------------------------------------------------|--------------------------------------|
| Von Korff, 1993, Seattle, USA (Group Health Cooperative) <sup>19</sup> | 18–74 years | 1128 | Characteristic back pain severity (1 year)  | Chronic Pain Grade III or IV (high disability, moderately or severely limiting pain) | 182 (21%)                            |
| Engel, 1996, Washington, USA (primary care) <sup>24</sup>              | 18–75 years | 1059 | Healthcare utilisation and costs (1 year)   | High back pain costs (≥ \$600)                                                       | 222 (21%)                            |
| Dionne, 1997, Quebec, Canada (primary care) <sup>26</sup>              | 18–75 years | 1213 | RMDQ (2 years)                              | 50% cut-off in modified RMDQ (from recursive partitioning model)                     | -                                    |
| Linton, 1998, multiple sites, Sweden (primary care) <sup>28</sup>      | 22–63 years | 142  | Accumulated sick leave (6 months)           | Short term leave (1–30 days)<br>Long term leave (≥31 days)                           | 18%<br>20%                           |
| Leroux, 2004, Quebec, Canada (primary care) <sup>45</sup>              | 18–64 years | 849  | Functional limitation (1 year) RMDQ         |                                                                                      |                                      |
| Dionne, 2005, Quebec, Canada (primary care) <sup>48</sup>              | 18–64 years | 1007 | Return to work in good health (2 years)     | Failure and failure after attempt group on RWGH index                                | Approx 20% in the two failure groups |

## C. Shoulder / neck pain

| First author, year of publication, city/state, country               | Age           | n   | Primary endpoint, (outcome measure, timing)                                         | Definition of poor outcome at primary endpoint                      | Observed frequency of poor outcome           |
|----------------------------------------------------------------------|---------------|-----|-------------------------------------------------------------------------------------|---------------------------------------------------------------------|----------------------------------------------|
| Croft, 1996, multicentre, UK (general practice) <sup>23</sup>        | Age not given | 166 | Disability (validated questionnaire) (6 and 18 months)                              | -                                                                   | -                                            |
| van der Windt, 1996, Netherlands (general practice) <sup>25</sup>    | >18 years     | 349 | Persistent symptoms (12 months)                                                     | Self reported persistent shoulder symptoms                          | 41%                                          |
| Bot, 2005, Multicentre, Netherlands (general practice) <sup>47</sup> | >18 years     | 443 | Patient perceived recovery, pain intensity, functional disability (3 and 12 months) | Symptoms still bothering patients                                   | 76% non-recovery 3m,<br>68% non-recovery 12m |
| Kuijpers, 2006, Netherlands, (general practice) <sup>55</sup>        | >18 years     | 587 | Persistent symptoms at 6 weeks and 6 months                                         | Less than 'full recovery' or 'very much recovered' on 8 point scale | 340 (70%) 6 weeks<br>249 (46%) 6 months      |

## D. Hip pain

| First author, year of publication, city/state, country           | Age                                                       | n   | Primary endpoint, (outcome measure, timing) | Definition of poor outcome at primary endpoint                           | Observed frequency of poor outcome                            |
|------------------------------------------------------------------|-----------------------------------------------------------|-----|---------------------------------------------|--------------------------------------------------------------------------|---------------------------------------------------------------|
| Birrell, 2003, multicentre, UK (general practice) <sup>39</sup>  | All consecutive consulters with a new episode of hip pain | 195 | Hip replacement listing (1 and 4 years)     | Being place on a waiting list for, or having received, a hip replacement | 7% 1 year<br>23% 4 years                                      |
| Lievensse, 2005, SW Netherlands (general practice) <sup>51</sup> | >18 years                                                 | 164 | Persistent pain (1 and 5 years)             | Persistent pain                                                          | 36% persistent pain (1 year)<br>29% persistent pain (5 years) |

## E. General musculoskeletal pain

| First author, year of publication, city/state, country, setting         | Age         | n    | Primary endpoint, (outcome measure, timing)                                                  | Definition of poor outcome at primary endpoint                                                                                                                                                                                                  | Observed frequency of poor outcome |
|-------------------------------------------------------------------------|-------------|------|----------------------------------------------------------------------------------------------|-------------------------------------------------------------------------------------------------------------------------------------------------------------------------------------------------------------------------------------------------|------------------------------------|
| Potter, 1992, Cheshire, UK (general practice) <sup>18</sup>             | 18–65 years | 45   | Chronic pain (26 weeks)                                                                      | Chronic pain                                                                                                                                                                                                                                    | 20 (44%)                           |
| Jorgensen, 2000, Aarhus, Denmark (primary care) <sup>34</sup>           | 18+ years   | 905  | Physical health<br><br>Sick leave<br>Medication use<br><br>Self-rated improvement (3 months) | SF-36: Dichotomised reliable change index (RCI) ≤ 1.96 indicates no change or statistically significant decrease<br>Sick leave: yes<br>Medication use: increased or unchanged<br>Self rated improvement: no improvement or marginal improvement | -                                  |
| Gureje, 2001, multinational (primary care) <sup>36</sup>                | 18–65 years | 3197 | Persistent pain (12 months)                                                                  | Non recovery from baseline persistent pain                                                                                                                                                                                                      | 555 (49%)                          |
| Atroshi, 2002, North-eastern Skåne, Sweden (primary care) <sup>37</sup> | 17–64 years | 189  | Long term sick leave (>3 months)                                                             | Continuous full-time sick leave for three months or longer because of musculoskeletal disorders                                                                                                                                                 | 36 (19%)                           |

## F. Knee pain

| First author, year of publication, city/state, country                        | Age        | n   | Primary endpoint, (outcome measure, timing)                                        | Definition of poor outcome at primary endpoint | Observed frequency of poor outcome               |
|-------------------------------------------------------------------------------|------------|-----|------------------------------------------------------------------------------------|------------------------------------------------|--------------------------------------------------|
| Van der Waal, 2005, multicentre, Netherlands (general practice) <sup>53</sup> | > 18 years | 251 | Patient perceived recovery, change in pain and physical function (3 and 12 months) | Persistent symptoms                            | 25% recovery 3 months<br>44% recovered 12 months |

## G. Elbow pain

| First author, year of publication, city/state, country               | Age        | n   | Primary endpoint, (outcome measure, timing)                                        | Definition of poor outcome at primary endpoint | Observed frequency of poor outcome                          |
|----------------------------------------------------------------------|------------|-----|------------------------------------------------------------------------------------|------------------------------------------------|-------------------------------------------------------------|
| Bot, 2005, multicentre, Netherlands (general practice) <sup>46</sup> | > 18 years | 181 | Patient perceived recovery, change in pain and physical function (3 and 12 months) | Persistent symptoms                            | 20 (13%) recovered 3 months<br>51 (34%) recovered 12 months |

Key: RMDQ Roland Morris Disability Questionnaire. VAS: Visual Analogue Scale. ODI: Oswestry Disability Inventory. TSK: Tampa Scale for Kinesiophobia. LBP: Lower Back Pain. ADL: Activity of Daily Living. PCS: Pain Catastrophising. RWGH: Return to Work in Good Health.
