# Supplementary material
Source: PubMed Central journal article supplement (PMC2099673)
Supplement: bjpg57-655TableS2.pdf [file bjpg57-655TableS2.pdf]

Supplementary Table 2. Results of quality assessment.

| First author,<br>reference <sup>a</sup> | Quality criteria |   |   |   |   |   |   |   |   |   |   |   |   |   |   | Score |
|-----------------------------------------|------------------|---|---|---|---|---|---|---|---|---|---|---|---|---|---|-------|
|                                         | A                | B | C | D | E | F | G | H | I | J | K | L | M | N | O |       |
| Dillane <sup>12</sup>                   | +                | + | - | + | - | - | - | + | + | + | - | - | + | + | - | 8     |
| Pedersen <sup>13</sup>                  | +                | + | + | + | - | + | + | + | + | + | + | - | + | + | - | 12    |
| Roland <sup>14</sup>                    | +                | + | + | + | - | + | + | + | ? | + | + | + | + | + | - | 12    |
| Roland <sup>15</sup>                    | +                | + | + | + | - | + | + | + | - | ? | + | + | + | + | - | 11    |
| Chavannes <sup>16</sup>                 | +                | + | + | + | - | + | + | + | - | + | + | - | + | + | - | 11    |
| Lanier <sup>17</sup>                    | +                | + | + | + | - | + | + | + | + | + | + | + | + | + | - | 13    |
| Potter <sup>18</sup>                    | +                | + | + | + | - | + | ? | + | + | ? | + | - | + | + | - | 10    |
| Von Korff <sup>19</sup>                 | +                | + | + | + | - | + | + | + | + | + | + | - | + | + | + | 13    |
| Coste <sup>20</sup>                     | +                | + | + | + | - | + | + | + | + | ? | + | - | + | + | - | 11    |
| Burton <sup>21</sup>                    | +                | + | + | + | - | + | + | + | + | ? | - | - | + | - | - | 9     |
| Klenerman <sup>22</sup>                 | +                | + | + | + | - | + | + | + | + | ? | - | + | + | + | ? | 11    |
| Croft <sup>23</sup>                     | +                | + | + | ? | - | + | + | + | + | ? | - | + | + | + | - | 10    |
| Engel <sup>24</sup>                     | +                | + | + | + | - | + | + | + | + | + | + | + | + | + | + | 14    |
| Van der<br>Windt <sup>25</sup>          | +                | + | + | + | - | + | + | + | + | + | + | - | + | + | - | 12    |
| Dionne <sup>26</sup>                    | +                | + | + | + | - | + | + | + | + | + | + | + | + | + | + | 14    |
| Van den<br>Hoogen <sup>27</sup>         | +                | + | + | + | - | + | + | + | + | + | + | + | + | + | + | 14    |
| Linton <sup>28</sup>                    | +                | + | + | + | - | + | + | + | + | + | + | - | + | - | - | 11    |
| Macfarlane <sup>29</sup>                | +                | + | + | + | - | + | + | + | + | - | + | + | + | + | - | 12    |
| Reis <sup>30</sup>                      | +                | + | + | + | - | + | + | + | - | ? | + | + | + | + | - | 11    |
| Schiottz-<br>Christensen <sup>31</sup>  | +                | + | + | ? | - | + | ? | + | + | ? | + | + | + | + | + | 11    |
| Thomas <sup>32</sup>                    | +                | + | + | ? | - | + | + | + | + | - | - | + | + | + | + | 11    |
| Carey <sup>33</sup>                     | +                | + | + | + | - | + | + | + | + | ? | - | - | - | + | - | 9     |
| Jorgensen <sup>34</sup>                 | +                | + | + | + | - | + | + | + | + | ? | ? | + | + | + | + | 12    |
| Werneke <sup>35</sup>                   | +                | + | + | ? | - | + | + | + | + | - | + | + | + | - | + | 11    |
| Gureje <sup>36</sup>                    | +                | + | + | - | - | + | + | + | + | + | - | + | + | + | - | 11    |
| Atroshi <sup>37</sup>                   | +                | + | + | + | - | + | + | + | + | - | + | + | + | + | - | 12    |
| Sieben <sup>38</sup>                    | +                | + | + | + | - | + | + | + | + | ? | - | - | + | + | - | 10    |
| Birrell <sup>39</sup>                   | +                | + | + | + | - | + | + | + | + | ? | + | + | + | + | + | 13    |
| Enthoven <sup>40</sup>                  | +                | + | + | + | - | + | + | + | + | ? | + | + | + | - | - | 11    |
| Burton <sup>41</sup>                    | +                | + | + | + | - | + | + | + | + | ? | - | + | + | + | - | 11    |
| Coste <sup>42</sup>                     | +                | + | + | + | - | + | + | + | ? | ? | + | - | + | + | - | 10    |
| Dunn <sup>43</sup>                      | +                | + | - | - | - | + | + | + | + | - | - | - | + | - | + | 8     |
| Leboeuf-Yde <sup>44</sup>               | +                | + | + | + | - | + | + | + | + | ? | - | - | + | + | + | 11    |
| Leroux <sup>45</sup>                    | +                | + | + | + | - | + | + | + | + | - | + | + | + | + | + | 13    |
| Bot <sup>46</sup>                       | +                | + | + | + | - | + | + | + | + | ? | + | + | + | + | + | 13    |
| Bot <sup>47</sup>                       | +                | + | + | + | - | + | + | + | + | ? | + | + | + | + | - | 12    |
| Dionne <sup>48</sup>                    | +                | + | + | + | - | + | + | ? | + | - | + | ? | + | + | - | 10    |
| Grotle <sup>49</sup>                    | +                | + | + | ? | - | + | + | + | + | ? | + | - | + | + | + | 11    |
| Kovacs <sup>50</sup>                    | +                | + | + | + | - | + | + | + | - | + | + | + | + | + | + | 13    |
| Livense <sup>51</sup>                   | +                | + | - | ? | - | + | + | + | + | - | ? | ? | ? | + | + | 8     |
| Sieben <sup>52</sup>                    | +                | + | + | ? | - | + | + | + | + | + | - | + | + | + | + | 12    |
| Van der Waal <sup>53</sup>              | +                | + | + | + | - | + | + | + | + | ? | + | + | + | + | + | 13    |
| Koleck <sup>54</sup>                    | +                | + | + | ? | - | ? | + | + | + | ? | + | - | ? | + | - | 8     |
| Kuijpers <sup>55</sup>                  | +                | + | + | + | - | + | + | + | + | ? | + | + | + | + | + | 13    |
| Swinkels-<br>Meewisse <sup>56</sup>     | +                | + | + | + | - | + | + | + | + | ? | - | + | + | - | + | 11    |

<sup>a</sup>Study reference corresponds to the number in the reference list (studies arranged in order of publication date). + Item present; - Item absent; ? Unclear.
